# Supplementary material
Source: PubMed Central journal article supplement (PMC4057975)

Supplemental Figure 1

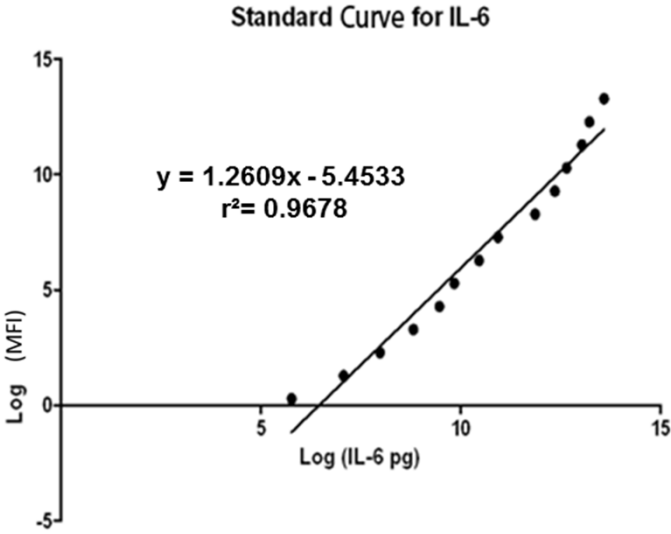

Supplement: NIHMS580652-supplement-Supplemental_Digital_Content.pdf [file NIHMS580652-supplement-Supplemental_Digital_Content.pdf]
